# Supplementary material
Source: MDPI journal article supplement (https://www.mdpi.com/search?q=forests-10-00963)
Supplement: s001 [file forests-10-00963-s001.pdf]

**Table S1.** Tree species used for the ranking.

| <b>Tree species</b>             |
|---------------------------------|
| <i>Acrocarpus fraxinifolius</i> |
| <i>Albizia schimperiana</i>     |
| <i>Annona reticulata</i>        |
| <i>Artocarpus heterophyllus</i> |
| <i>Bridelia micrantha</i>       |
| <i>Carica papaya</i>            |
| <i>Citrus limon</i>             |
| <i>Citrus sinensis</i>          |
| <i>Commiphora eminii</i>        |
| <i>Cordia africana</i>          |
| <i>Croton macrostachyus</i>     |
| <i>Eucalyptus maculata</i>      |
| <i>Grevillea robusta</i>        |
| <i>Mangifera indica</i>         |
| <i>Margaritaria discoidea</i>   |
| <i>Markhamia lutea</i>          |
| <i>Musa spp.</i>                |
| <i>Persea americana</i>         |
| <i>Psidium guajava</i>          |
| <i>Rauwolfia caffra</i>         |
| <i>Senna siamea</i>             |
| <i>Syzygium cuminii</i>         |

**Table S2.** Ecosystem services used for the ranking.

| <b>Ecosystem services</b>  |
|----------------------------|
| Firewood supply            |
| Fodder supply              |
| Food provision             |
| Increasing coffee quality  |
| Increasing coffee yield    |
| Mulch provision            |
| Protection against wind    |
| Protection from heat       |
| Shade provision            |
| Soil fertility improvement |
| Soil moisture enhancement  |
| Weed suppression           |

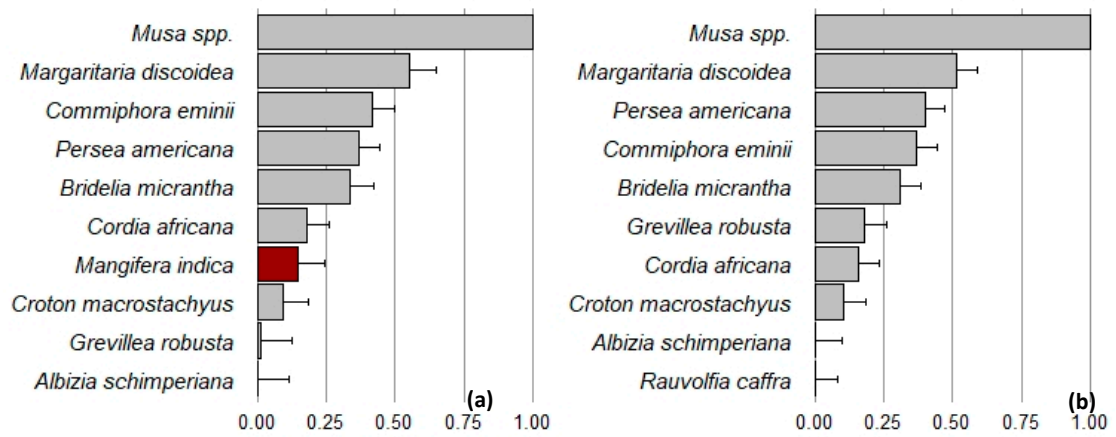

**Figure S1.** Scores and quasi-standard errors of tree species for fodder supply at (a) lower elevations (1148–1335 m asl) and (b) higher elevations (1336–1748 m asl). Red bars show tree species with significantly different scores between the two groups.

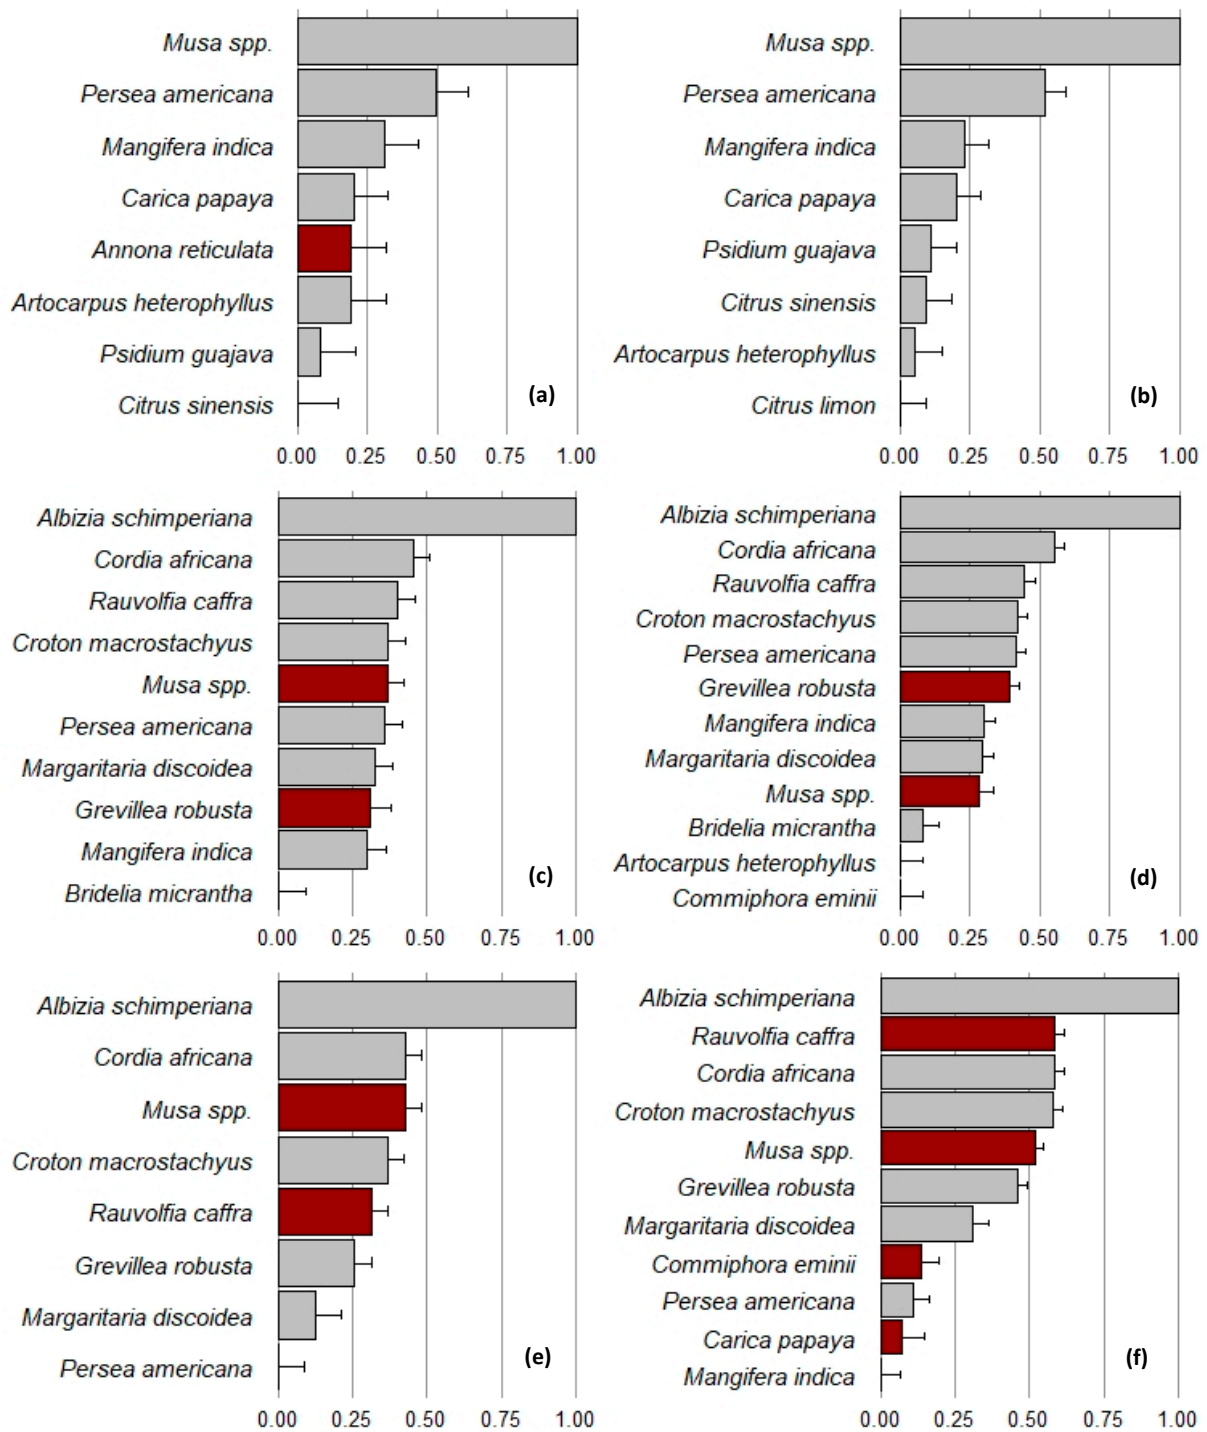

**Figure S1.** Scores and quasi-standard errors of tree species for food provision (a,b), shade provision (c,d), and soil fertility (e,f) divided by gender (women are presented in a, c and e; men are presented in b, d and f). Red bars show tree species with significantly different scores between the two groups.

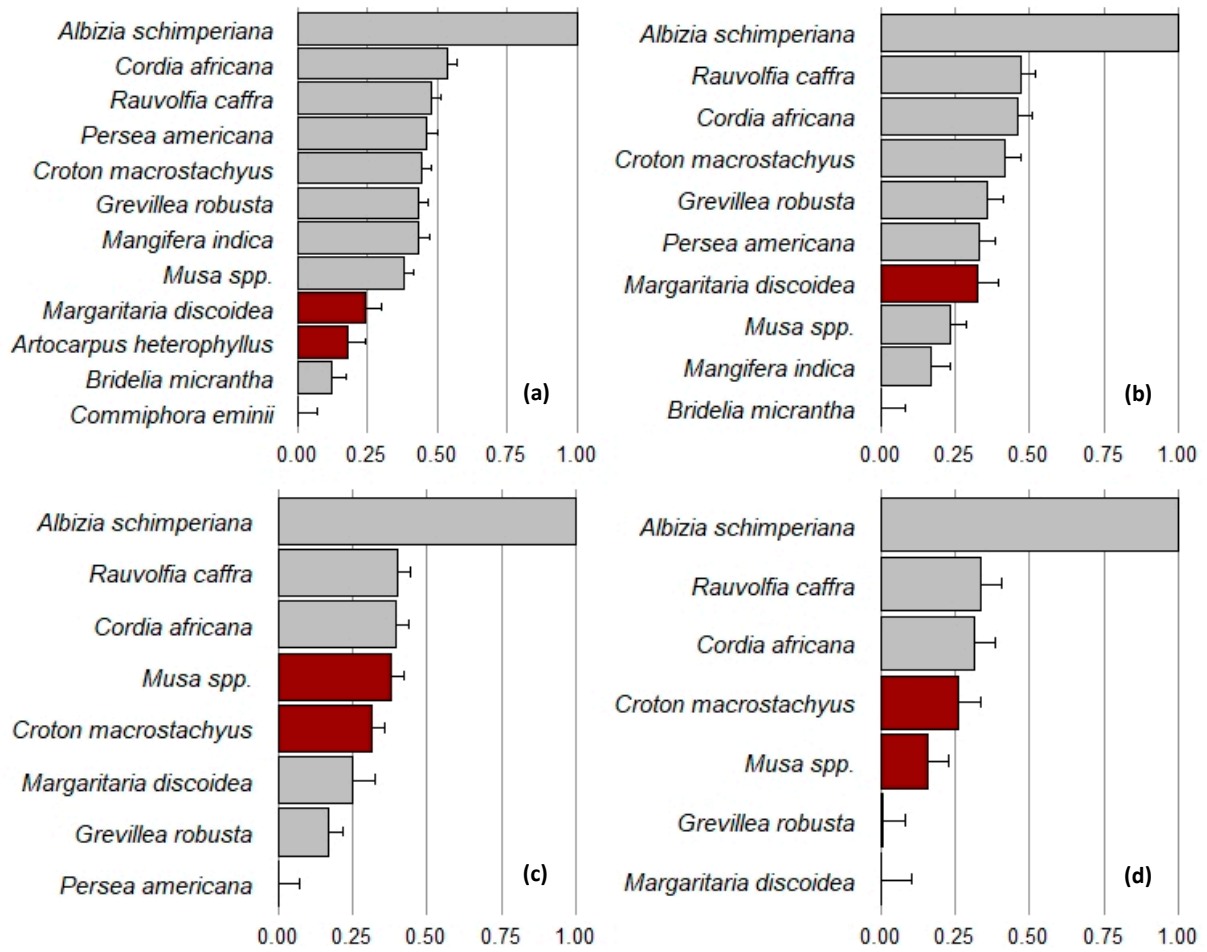

**Figure S3.** Scores and quasi-standard errors of tree species for protection from heat (a,b), and increasing coffee quality (c,d) divided by affiliation to a farmers group (non-members are presented in a and c; members are presented in b and d). Red bars show tree species with significantly different scores between the two groups.
